# Supplementary material for: Ecophysiological characteristics of red, green and brown strains of the Baltic picocyanobacterium Synechococcus sp. – a laboratory study
Source: Copernicus journal article supplement (doi:10.5194/bg-2018-19), 2018-02-08
Supplement: Supplementary file [file bg-2018-19-AC3-supplement.pdf]

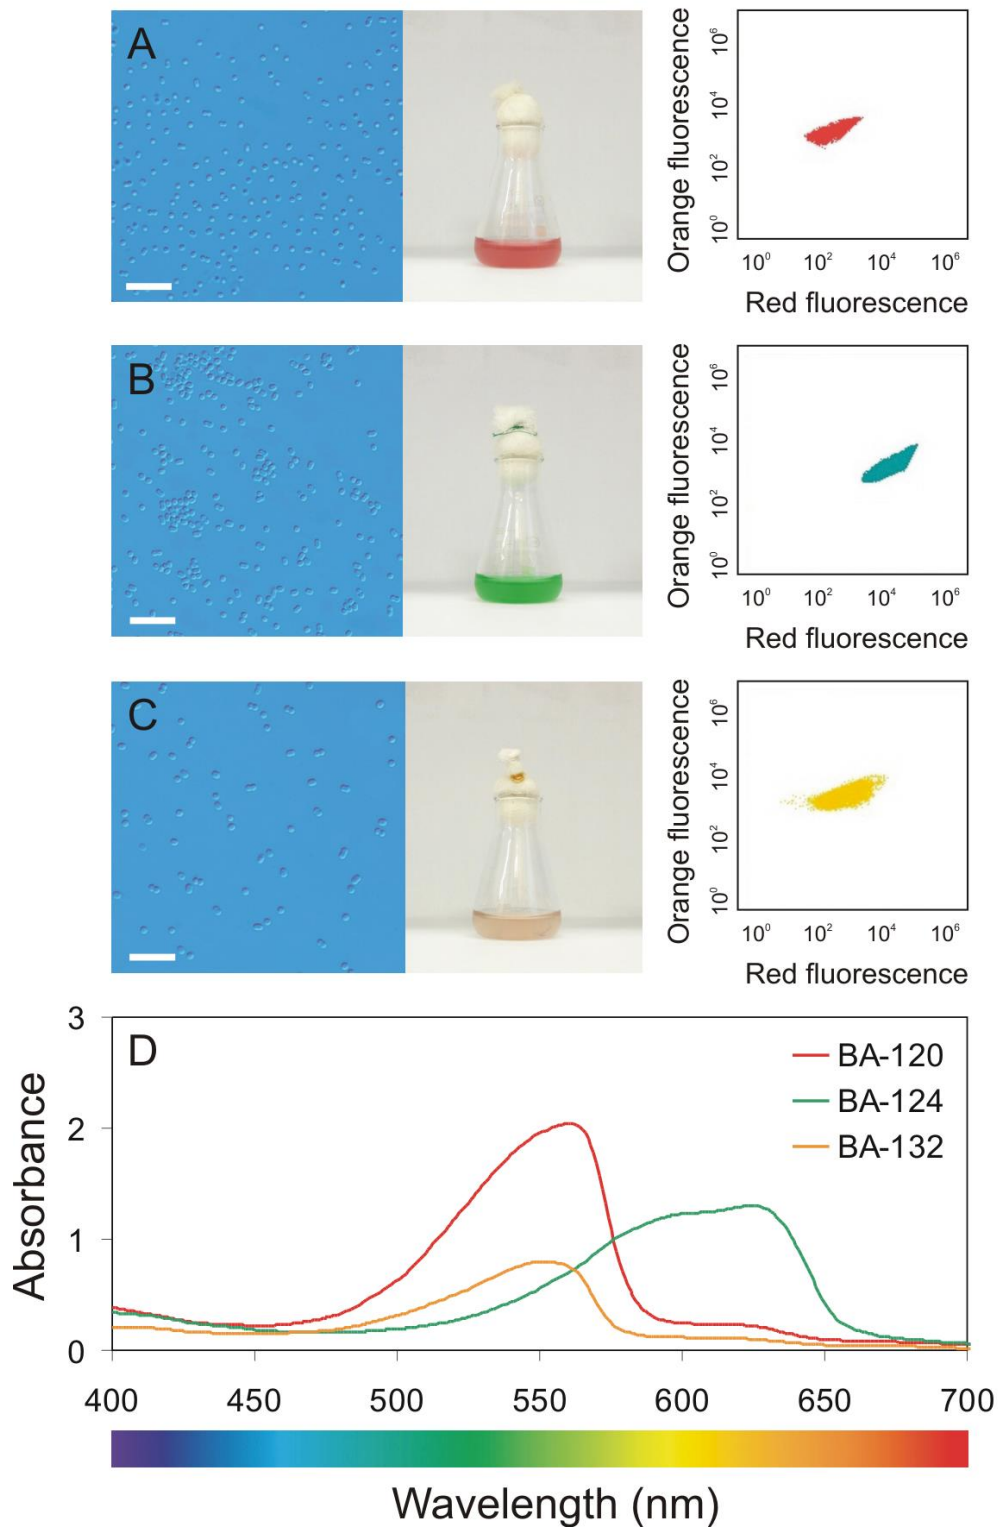

**Figure S1:** Left-side top panel (A, B, C) – light microscope photographs of three *Synechococcus* sp. strains (scale bar = 10  $\mu$ m) along with the photographs of the cultures in 25-mL glass Erlenmeyer flasks; right-side top panel – scatter plots of orange fluorescence vs. red fluorescence analyzed using a BD Accuri™ C6 Plus flow cytometer and bottom panel (D) – PAR absorption spectra obtained for the mixture of phycobilin pigments for each *Synechococcus* sp. strain.
